# Supplementary material for: Spezifische Beziehungsmerkmale als Wirkfaktoren in der Autismustherapie
Source: Springer Nature journal article supplement (doi:10.1007/s00739-019-00593-9), 2019-09-17
Supplement: MOESM1 [file 17182556]

**Literatur**

Altmeyer, M. & Thomä, H. (2010): Die vernetzte Seele: Die intersubjektive Wende in der Psychoanalyse. Klett-Cotta, Stuttgart.

American Psychiatric Association (2015): Diagnostisches und Statistisches Manual Psychischer Störungen – DSM-V. Hogrefe, Göttingen.

Asay T. & Lambert M. (2001). Empirische Argumente für die allen Therapien gemeinsamen Wirkfaktoren: Quantitative Ergebnisse. In: M. Hubble, B. Duncan, & S. Miller (Hrsg.): So wirkt Psychotherapie. Empirische Ergebnisse und praktische Folgerungen. Verlag Modernes Lernen, Dortmund.

Asperger, H. (1944): Die „Autistischen Psychopathen“ im Kindesalter. Archiv für Psychiatrie und Nervenkrankheiten, 117, 76–136.

Baily, A., Le Couteur, A., Gottesman, I., Bolton, P., Simonoff, E., Yuzda, E. and Rutter, M. (1995): Autism as a strongly genetic disorder: evidence from a British twin study. Psychol Med, 25, 1, 63–77.

Baldwin, S. A. & Imel, Z. E. (2013): Therapists effects. In: Lambert, M. J. (Hrsg.): Bergin and Garfielďs handbook of psychotherapy and behavior change, pp. 258-297, Wiley, New York

Baron-Cohen, S., Leslie, A. M., Frith, U. (1985): Does the autistic child have a „theory of mind“? Cognition 21, 37–46.

Baron-Cohen, S., Ring, H. A., Weelwright, S., Bullmore, E. T., Brammer, M. J., Simmons, A. & Williams, S. C. (1999): Social intelligence in the normal and autistic brain: An fMRI study. European Journal of Neuroscience, 11, 1891–1898.

Bleuler, E. (1911): Dementia praecox oder Gruppe der Schizophrenen. In Aschaffenburg, G. (Hrsg.): Handbuch der Psychiatrie (Spezieller Teil B: 4/1). Deuticke, Leipzig.

Boetticher, D. v. (2014): Die therapeutische Beziehung in der psychosozialen Medizin. Klinische und anthropologische Aspekte. Kohlhammer, Stuttgart.

Bordin, E. S. (1979): The generalizability of the psychoanalytic concept of the working alliance. Psychotherapie: Theory, Research & Practice, 16, 252–260.

Braun, C. (2016): Die therapeutische Beziehung: Konzept und Praxis in der Analytischen Psychologie C. G. Jungs. Kohlhammer, Stuttgart.

Brockmann, J., Kirsch, H., Hatcher, R., Andreas, S., Benz, S., Sammet, I. (2011): Dimensionen der therapeutischen Beziehung aus Patienten-Perspektive – Entwicklung der „Skala therapeutische Allianz-Revised STA-R“. Psychotherapie Psychosomatik Medizinische Psychologie, 61, 208–215.

Caspar, F. (2008): Motivorientierte Beziehungsgestaltung – Konzept, Voraussetzungen bei den Patienten und Auswirkungen auf Prozess und Ergebnisse. In: Hermer, M. & Röhrle, B. (Hrsg.): Handbuch der therapeutischen Beziehung, 527–558, dgvt-Verlag, Tübingen.

Döringer, I. (u. M. v. Müller, C.) (2017): Zur Diskussion der Wirksamkeit von Autismus-Therapien. In: Rittmann, B. & Rickert-Bolg, W. (Hrsg.): Autismus-Therapie in der Praxis. Methoden, Vorgehensweisen, Falldarstellungen. Kohlhammer, Stuttgart.

Folstein, S. & Rutter, M. (1977): Infantile autism: A genetic study of 21 twin pairs. Journal of Child Psychology and Psychiatry and Allied Disciplines, 18, 297–321.

Fonagy, P., Gergely, G., Jurist, E. L. & Target, M. (2004): Affektregulierung, Mentalisierung und die Entwicklung des Selbst. Klett-Cotta, Stuttgart.

Freitag, C. M., Kitzerow, J., Medda, J., Soll, S. & Cholemkery, H. (2017): Autismus-Spektrum-Störungen. Hogrefe, Göttingen.

Freud, S. (1916/17): Vorlesungen zur Einführung in die Psychoanalyse. Fischer, Frankfurt a. M.

Hanswille, R. (Hrsg.) (2015): Handbuch systemische Kinder- und Jugendpsychotherapie. Vandenhoeck & Ruprecht, Göttingen.

Happ, F. & Frith, U. (2006): The weak coherence account: detail-focused cognitive style in autism spectrum disorders. Journal of autism and developmental disorders, 36 (1), 5–25.

Horvath, A. O., Del Re A. C., Flückiger, C., Symonds, D. (2011): Alliance in individual psychotherapy. Psychotherapy, 48, 9–16.

Goodman, G., Midgley, N. & Schneider, C. (2016): Expert clinicians’ prototypes of an ideal child treatment in psychodynamic and cognitive-behavioral therapy: Is mentalization seen as a common process factor? Psychotherapy Research, 26 (5), 590–601.

Just, M. A., Cherkassky, V. L., Keller, T. A., Kana, R. K., Minshew, N. J. (2007): Functional and anatomical cortical underconnectivity in autism: evidence from FMRI study of an executive function task and corpus callosum morphometry. Cerebral Cortex, 17($), 951–961.

Kahraman, B. (2008): Die kultursensible Therapiebeziehung. Störungen und Lösungsansätze am Beispiel türkischer Klienten. Psychosozial-Verlag, Gießen.

Kanner, L. (1943): Autistic disturbances of affective contact. Nervous Child, 2(3), 217–250.

Lammers, C.-H. (2017): Therapeutische Beziehung und Gesprächsführung. Beltz, Weinheim.

Lammers, C.-H. & Schneider, W. (2009): Die therapeutische Beziehung. Verfahrensübergreifende Aspekte. Psychotherapeut, 6, 469–483.

McFadden, K., Minshew N. J. (2013): Evidence for dysregulation of axonal growth and guidance in the etiology of ASD. Front Hum Neurosci, 7, 671.

McCullough, J. P. (2011): Therapeutische Beziehung und die Behandlung chronischer Depressionen. Springer, Berlin.

Nashef, A. (2015a): Das Drama des autistischen Kindes. Ein differenzialdiagnostischer Annäherungsversuch. Psychopraxis. Neuropraxis, 18 (3), 88–90.

Nashef, A. (2015b): Multifamilientherapie für Asperger-Betroffene und deren Familien. Zeitschrift für systemische Therapie und Beratung. 33(2), 77–84.

Nissen, B. (2015): Zur psychoanalytischen Konzeptualisierung und Behandlung von Störungen aus dem autistischen und autistoiden Spektrum. Psychotherapeutenjournal, 2, 110–119.

Norcross, J. C. & Lambert, M. J. (2011): Psychotherapy relationship that works II. Psychotherapy, 48, 4–8.

Orlinsky, D. E., Ronnestad, M. H., Willutzki, U. (2004): Fifty years of psychotherapy process-outcome research: Continuity and Change. In: Lambert, M. J. (Hrsg.): Bergin and Garfieldʾs Handbook of Psychotherapy and Behavior Change (5th ed.). Wiley, New York, 307–389.

Rickert-Bolg, W. (2017): Evaluation der Arbeit von Autismus-Zentren. In: Rittmann, B. & Rickert-Bolg, W. (Hrsg.): Autismus-Therapie in der Praxis. Methoden, Vorgehensweisen, Falldarstellungen. Kohlhammer, Stuttgart.

Rittmann, B. (2014): Die Bedeutung verhaltenstherapeutischer Förderung in Autismus-Therapiezentren. Autismus 78, 21–31.

Rogers, C. (1983): Therapeut und Klient. Fischer, Frankfurt a. M.

Schmidt-Traub, S. (2003): Therapeutische Beziehung – ein Überblick. Psychotherapeutische Praxis, 3 (3), 111–129.

Scholz, M. (2018): Paradigmenwechsel in der Therapeutenrolle. In: Asen, E. & Scholz, M.: Handbuch der Multifamilientherapie. Carl-Auer, Heidelberg, 25–32.

Schopler, E., Brehm, S., Kinsbourne, M., Reichler, R. (1971): Effect of treatment structure on development in autistic children. Arch Gen Psychiatry, 24, 415–421.

Schulz-Venrath, U. (2013): Lehrbuch Mentalisieren. Psychotherapien wirksam gestalten. Klett-Cotta, Stuttgart.

Senf, W., Broda, M., Wilms, B. (2012): Therapeutische Beziehung. In: Senf, W. & Broda, M.: Praxis der Psychotherapie. 5. Aufl., Thieme, Stuttgart, 105–111.

Staats, H. (2017): Die therapeutische Beziehung: Spielarten und verwandte Konzepte. Vandenhoeck & Ruprecht, Göttingen.

Stucki, C. & Grawe, K. (2007): Bedürfnis- und Motivorientierte Beziehungsgestaltung. Hinweise und Handlungsanweisungen für Therapeuten. Psychotherapeut, 52, 16–23.

Taubner, S. (2015): Konzept Mentalisieren: Eine Einführung in Forschung und Praxis. Psychosozial, Gießen.

Tustin, F. (1988): Psychotherapy with children who cannot play. Int. Rev. Psychoanalysis, 15, 93–106.

Wampold, B. E., Imel, Z. E. & Flückinger, C. (2018): Die Psychotherapie-Debatte. Was Psychotherapie wirksam macht. Hogrefe, Bern.

Wing, L. (1981): Aspergerʼs syndrome, a clinical account. Psychol Med, 1, 115–130.

World Health Organization (1992): The ICD-10 classification of mental and behavioural disorders. Clinical descriptions and guidelines. WHO. Geneva.

Zimmer, D. & Zimmer, F.T. (1992). Die therapeutische Beziehung in der Verhaltenstherapie: Konzepte und Gestaltungsmöglichkeiten. In: J. Margraf & J.C. Brengelmann (Hrsg.), Die therapeutische Beziehung in der Verhaltenstherapie. G. Röttger, München.
